# Supplementary material for: Latitude Oscillations of Zonal Mean Total Electron Content and Super-Fountain Effects Provided from Global GNSS Stations
Source: Copernicus journal article supplement (doi:10.5194/angeo-2021-34), 2021-06-23
Supplement: Supplementary file 1 [file angeo-2021-34-supplement.pdf]

**Supporting Information for**  
**“Latitude Oscillations of Zonal Mean Total Electron Content and Super-Fountain Effects**  
**Provided from Global GNSS Stations”**

**M. Joghataei<sup>1</sup>, N. Jooyandeh<sup>1</sup> and M. H. Memarian<sup>1</sup>**

1- Department of Physics, Yazd University, Yazd, Iran

---

Contents

1. supplementary Figures for Figure.1 and 2
2. supplementary figures for Figure. 6 &7

# 1. supplementary Figures for Figure.1 & 2

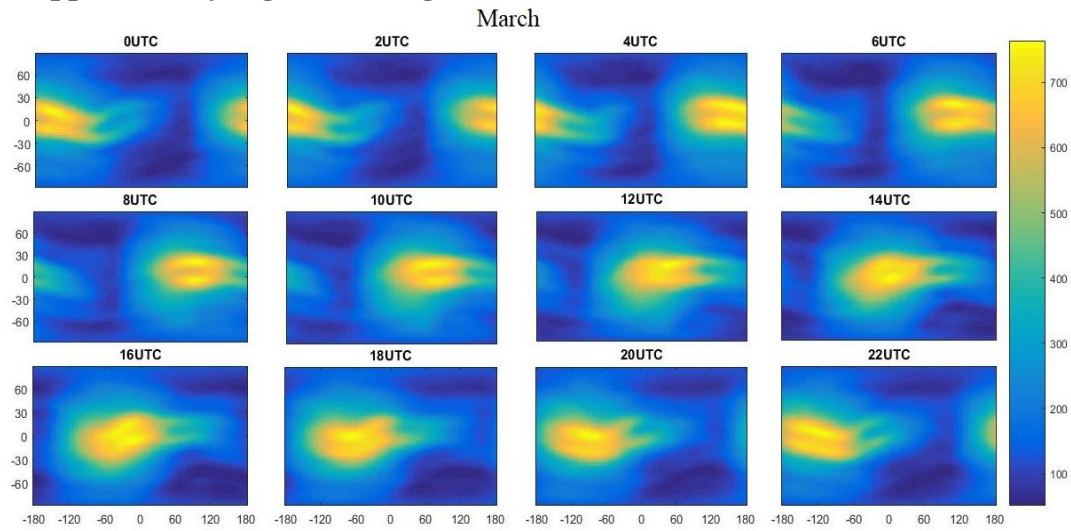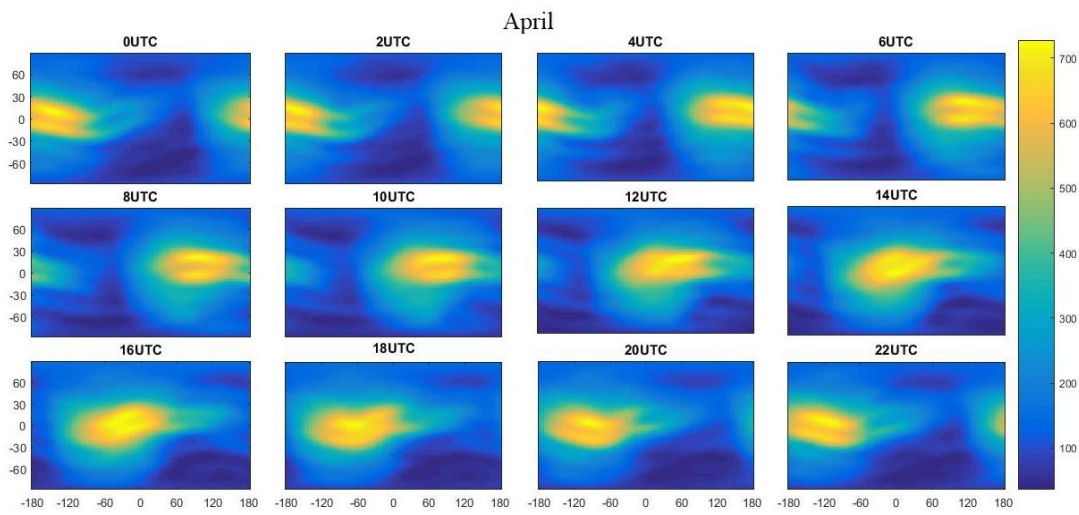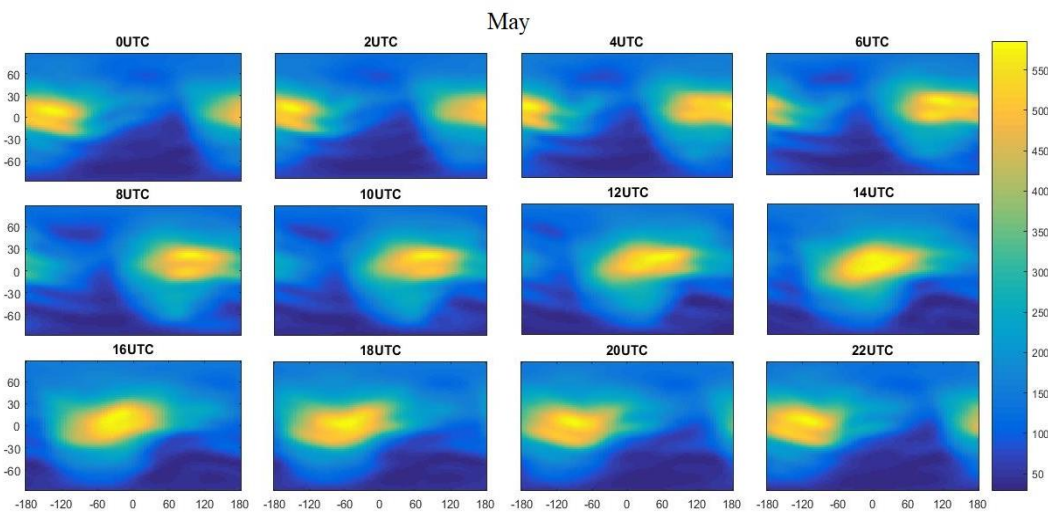

**S1.** Hourly-monthly means of TEC for the months of March-May during 1999-2019

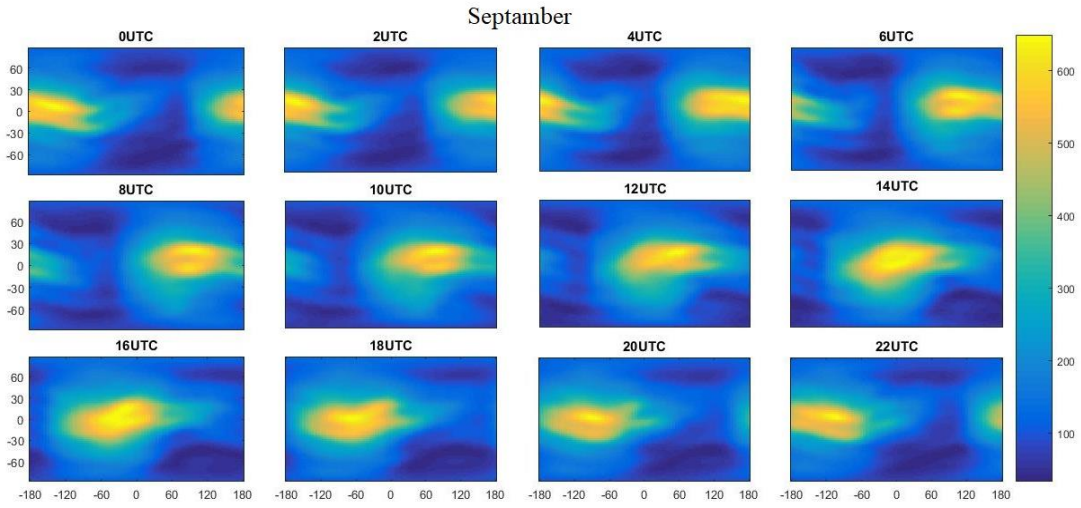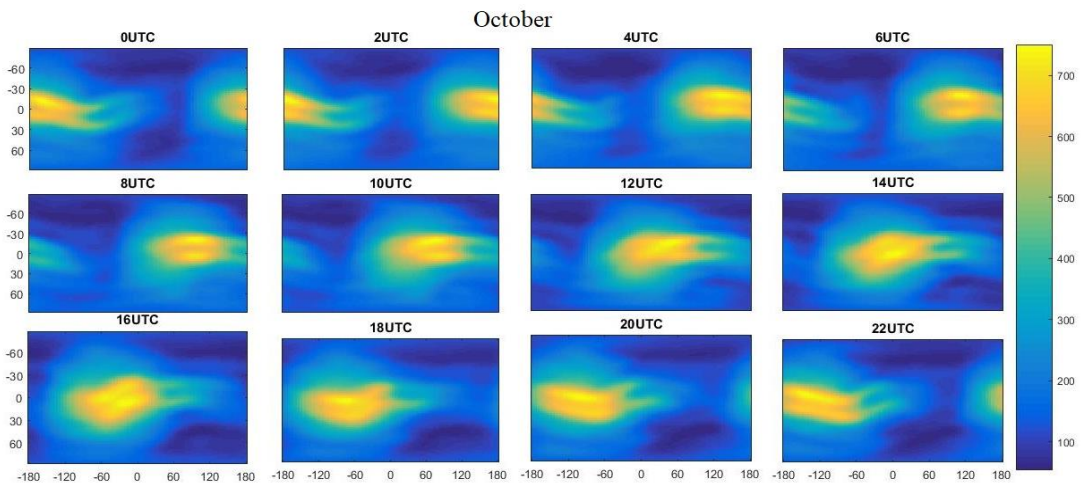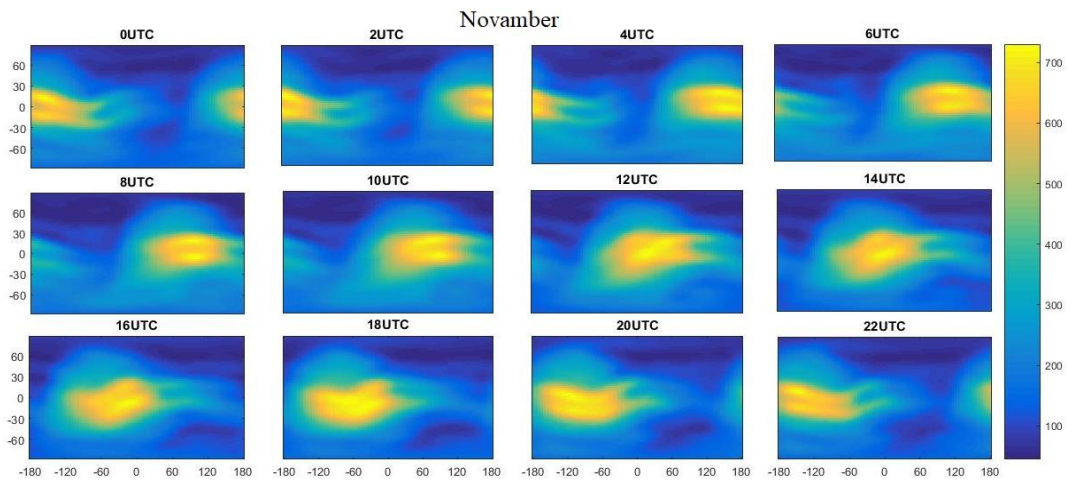

**S2.** Hourly-monthly means of TEC for the months of September-November during 1999-2019.

## 2. supplementary figures for Figure. 6 &7

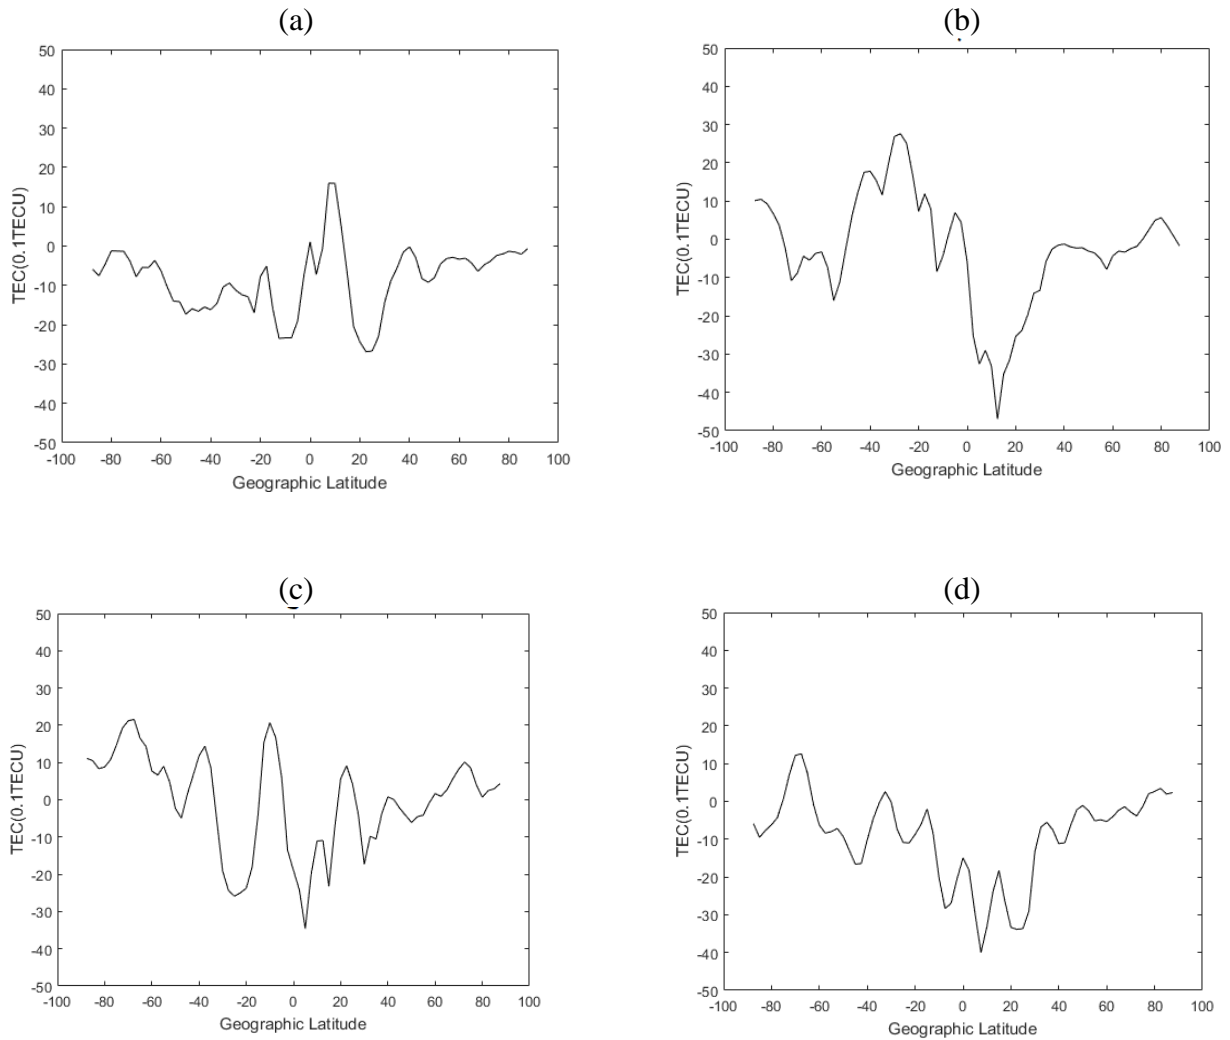

**S3.** The super-fountain effect on zonal mean TEC (0.1 TECU) during geomagnetic storm a) 8 January, b) 9 January c) 10 January and d) 11 January of 2009.
